# Supplementary material
Source: PubMed Central journal article supplement (PMC5498157)
Supplement: NIHMS873100-supplement-Supporting.pdf [file NIHMS873100-supplement-Supporting.pdf]

## SUPPORTING INFORMATION

### Oncometabolites D- and L-2-hydroxyglutarate Inhibit the AlkB Family DNA Repair Enzymes under Physiological Conditions

Fangyi Chen,<sup>†,‡</sup> Ke Bian,<sup>†,‡</sup> Qi Tang,<sup>†</sup> Bogdan I. Fedeles,<sup>†,§,‡</sup> Vipender Singh,<sup>†,§,‡,Δ</sup> Zachary T. Humulock,<sup>†</sup> John M. Essigmann,<sup>†,§,‡</sup> and Deyu Li<sup>\*,†</sup>

<sup>†</sup>Department of Biomedical and Pharmaceutical Sciences, College of Pharmacy, University of Rhode Island, Kingston, Rhode Island 02881, United States.

Departments of <sup>‡</sup>Biological Engineering, <sup>§</sup>Chemistry, and <sup>‡</sup>Center for Environmental Health Sciences, Massachusetts Institute of Technology, Cambridge, Massachusetts 02139, United States.

Present Address: <sup>Δ</sup>Novartis Institute of Biomedical Research, Cambridge, Massachusetts 02139, United States.

Corresponding Author: \*E-mail: [deyuli@uri.edu](mailto:deyuli@uri.edu)

<sup>‡</sup>F.C. and K.B. contributed equally to this work.

#### Table of Contents

**Table S1.** Calculated and observed molecular weight (MW) and m/z value of oligonucleotides used in the enzymatic reactions.

**Table S2.** Initial rate for kinetic studies of ALKBH2, ALKBH3 and AlkB on  $\alpha$ KG as a substrate under different conditions.

**Table S3.** Initial rate for kinetic studies of ALKBH2 and ALKBH3 on DNA adducts as substrates.

**Table S4.** Kinetic constants of ALKBH2 and ALKBH3 reactions on DNA adducts as substrates.

**Table S5.** 2-HG inhibition on ALKBH2 demethylation of ss- and ds-m1A.

**Table S6.** Addition of  $\alpha$ KG reverses the inhibitory effect of 2HG toward ALKBH2, ALKBH3 and AlkB.

**Table S7:** IC<sub>50</sub> (50% inhibition concentration) of L-2HG, D-2HG and N-OG on ALKBH2, ALKBH3 and AlkB.

**Figure S1.** Steady-state kinetic studies probing the influence of  $\alpha$ KG on adduct demethylation reactions catalyzed by ALKBH2.

**Figure S2.** Steady-state kinetic studies probing the influence of  $\alpha$ KG on adduct demethylation reactions catalyzed by ALKBH3.

**Figure S3.** Steady-state kinetic studies probing the influence of  $\alpha$ KG on adduct demethylation reactions catalyzed by AlkB.

**Figure S4.** Steady-state kinetic studies probing the influence of adducts in the demethylation reactions catalyzed by ALKBH2 and ALKBH3.

**Figure S5.** The repair percentage of AlkB on ss-m1A under various concentrations of  $\alpha$ KG.

**Figure S6.** Inhibition of ALKBH2-mediated ss-m1A repair by D-2HG, L-2HG and N-OG.

**Figure S7.** Inhibition of ALKBH2-mediated ss-m3C repair by D-2HG, L-2HG and N-OG.

**Figure S8.** Inhibition of ALKBH2-mediated ds-m1A repair by D-2HG, L-2HG and N-OG.

**Figure S9.** Inhibition of ALKBH2-mediated ds-m3C repair by D-2HG, L-2HG and N-OG.

**Figure S10.** Inhibition of ALKBH3-mediated ss-m1A repair by D-2HG, L-2HG and N-OG.

**Figure S11.** Inhibition of ALKBH3-mediated ss-m3C repair by D-2HG, L-2HG and N-OG.

**Figure S8.** Inhibition of ALKBH2-mediated ds-m1A repair by D-2HG, L-2HG and N-OG.

**Figure S9.** Inhibition of ALKBH2-mediated ds-m3C repair by D-2HG, L-2HG and N-OG.

**Figure S10.** Inhibition of ALKBH3-mediated ss-m1A repair by D-2HG, L-2HG and N-OG.

**Figure S11.** Inhibition of ALKBH3-mediated ss-m3C repair by D-2HG, L-2HG and N-OG.

**Figure S12.** Inhibition of AlkB-mediated ss-m1A repair by D-2HG, L-2HG and N-OG.

**Figure S13.** Inhibition of AlkB-mediated ss-m3C repair by D-2HG, L-2HG and N-OG.

**Figure S14.** Inhibition of AlkB-mediated ds-m1A repair by D-2HG, L-2HG and N-OG.

**Figure S15.** Inhibition of AlkB-mediated ds-m3C repair by D-2HG, L-2HG and N-OG.

**Table S1.** Calculated and observed molecular weight (MW) and m/z value of oligonucleotides used in the enzymatic reactions. The sequence of the 16mer oligonucleotides was 5'-GAAGACCTXGGCGTCC-3', where X indicates m1A or m3C. The sequence of the complementary 23mer oligonucleotides was 5'-CTGGGACGCCYAGGTCTTCACTG-3', where Y represents the position opposite the lesion site and contains the canonical bases T and G; these molecules were named 23-Tcp and 23-Gcp, respectively. Additionally, 23mer oligonucleotides complementary to 23-Tcp and 23-Gcp were also synthesized with the sequence 5'-CAGTGAAGACCTZGGCGTCCCAG-3', where Z denotes the regular bases A and C, and named 23-A and 23-C, respectively.

| Oligonucleotide | MW (calculated) of neutral species | m/z (calculate) -4 charge peak | m/z (observed) -4 charge peak |
|-----------------|------------------------------------|--------------------------------|-------------------------------|
| 16mer m1A       | 4902.88                            | 1224.71                        | 1224.71                       |
| 16mer m3C       | 4878.87                            | 1218.71                        | 1218.70                       |
| Oligonucleotide | MW (calculated) of neutral species | m/z (calculate) -5 charge peak | m/z (observed) -5 charge peak |
| 23mer Tcp       | 7028.19                            | 1404.63                        | 1404.66                       |
| 23mer Gcp       | 7053.19                            | 1409.63                        | 1409.66                       |
| 23mer A         | 7055.22                            | 1410.04                        | 1410.06                       |
| 23mer C         | 7031.21                            | 1405.23                        | 1405.26                       |

**Table S2.** Initial rate for kinetic studies of ALKBH2, ALKBH3 and AlkB on  $\alpha$ KG as a substrate under different conditions. The reaction rate is in  $\mu$ M/min.

| $\alpha$ KG ( $\mu$ M) | ALKBH2 reaction Rate |                 | $\alpha$ KG ( $\mu$ M) | ALKBH2 reaction Rate |                 |
|------------------------|----------------------|-----------------|------------------------|----------------------|-----------------|
|                        | ss-m1A               | ds-m1A          |                        | ss-m3C               | ds-m3C          |
| 5.0                    | 0.10 $\pm$ 0.00      | 0.16 $\pm$ 0.01 | 1.0                    | 0.14 $\pm$ 0.00      | 0.10 $\pm$ 0.01 |
| 10.0                   | 0.11 $\pm$ 0.01      | 0.21 $\pm$ 0.03 | 3.0                    | 0.22 $\pm$ 0.00      | 0.15 $\pm$ 0.01 |
| 20.0                   | 0.14 $\pm$ 0.01      | 0.26 $\pm$ 0.03 | 5.0                    | 0.29 $\pm$ 0.02      | 0.18 $\pm$ 0.03 |
| 30.0                   | 0.15 $\pm$ 0.00      | 0.30 $\pm$ 0.02 | 10.0                   | 0.30 $\pm$ 0.02      | 0.21 $\pm$ 0.02 |
| 50.0                   | 0.16 $\pm$ 0.02      | 0.32 $\pm$ 0.03 | 20.0                   | 0.32 $\pm$ 0.01      | 0.23 $\pm$ 0.02 |
| 70.0                   |                      | 0.35 $\pm$ 0.03 | 30.0                   | 0.32 $\pm$ 0.03      | 0.25 $\pm$ 0.02 |

| $\alpha$ KG ( $\mu$ M) | ALKBH3 reaction rate |                 |
|------------------------|----------------------|-----------------|
|                        | ss-m1A               | ss-m3C          |
| 5.0                    | 0.20 $\pm$ 0.02      | 0.24 $\pm$ 0.00 |
| 10.0                   | 0.24 $\pm$ 0.01      | 0.29 $\pm$ 0.01 |
| 20.0                   | 0.26 $\pm$ 0.01      | 0.30 $\pm$ 0.01 |
| 30.0                   | 0.28 $\pm$ 0.01      | 0.30 $\pm$ 0.02 |
| 50.0                   | 0.28 $\pm$ 0.01      | 0.32 $\pm$ 0.01 |
| 70.0                   | 0.28 $\pm$ 0.02      | 0.33 $\pm$ 0.01 |

| $\alpha$ KG ( $\mu$ M) | AlkB reaction rate |                 |                 |                 |
|------------------------|--------------------|-----------------|-----------------|-----------------|
|                        | ss-m1A             | ds-m1A          | ss-m3C          | ds-m3C          |
| 5.0                    | 0.17 $\pm$ 0.01    | 0.20 $\pm$ 0.02 | 0.31 $\pm$ 0.03 | 0.46 $\pm$ 0.04 |
| 10.0                   | 0.25 $\pm$ 0.01    | 0.32 $\pm$ 0.05 | 0.49 $\pm$ 0.05 | 0.53 $\pm$ 0.04 |
| 20.0                   | 0.30 $\pm$ 0.03    | 0.44 $\pm$ 0.02 | 0.75 $\pm$ 0.09 | 0.78 $\pm$ 0.07 |
| 30.0                   | 0.35 $\pm$ 0.02    | 0.51 $\pm$ 0.02 | 0.87 $\pm$ 0.13 | 0.92 $\pm$ 0.04 |
| 50.0                   | 0.34 $\pm$ 0.04    | 0.60 $\pm$ 0.01 | 1.04 $\pm$ 0.10 | 0.99 $\pm$ 0.09 |
| 70.0                   | 0.39 $\pm$ 0.04    | 0.59 $\pm$ 0.04 | 1.17 $\pm$ 0.12 | 1.09 $\pm$ 0.06 |

**Table S3.** Initial rate for kinetic studies of ALKBH2 and ALKBH3 on DNA adducts as substrates.

| ALKBH2 reaction rate |                   |                   |                   |                   |                   |                   |                   |
|----------------------|-------------------|-------------------|-------------------|-------------------|-------------------|-------------------|-------------------|
| ss-m1A ( $\mu$ M)    | V0 ( $\mu$ M/min) | ds-m1A ( $\mu$ M) | V0 ( $\mu$ M/min) | ss-m3C ( $\mu$ M) | V0 ( $\mu$ M/min) | ds-m3C ( $\mu$ M) | V0 ( $\mu$ M/min) |
| 7.5                  | 0.31 $\pm$ 0.02   | 5.0               | 0.26 $\pm$ 0.05   | 2.5               | 0.18 $\pm$ 0.01   | 2.5               | 0.22 $\pm$ 0.02   |
| 10.0                 | 0.36 $\pm$ 0.03   | 7.5               | 0.34 $\pm$ 0.03   | 3.5               | 0.20 $\pm$ 0.01   | 5.0               | 0.25 $\pm$ 0.02   |
| 12.5                 | 0.49 $\pm$ 0.02   | 10.0              | 0.41 $\pm$ 0.04   | 4.5               | 0.24 $\pm$ 0.02   | 7.5               | 0.30 $\pm$ 0.01   |
| 15.0                 | 0.53 $\pm$ 0.05   | 12.5              | 0.47 $\pm$ 0.04   | 5.5               | 0.25 $\pm$ 0.02   | 10.0              | 0.37 $\pm$ 0.04   |
| 17.5                 | 0.53 $\pm$ 0.08   | 15.0              | 0.52 $\pm$ 0.10   | 6.5               | 0.27 $\pm$ 0.02   | 12.5              | 0.41 $\pm$ 0.02   |
| 20.0                 | 0.66 $\pm$ 0.03   | 17.5              | 0.53 $\pm$ 0.09   | 7.5               | 0.31 $\pm$ 0.04   | 15.0              | 0.42 $\pm$ 0.03   |

| ALKBH3 reaction rate |                   |                   |                   |
|----------------------|-------------------|-------------------|-------------------|
| ss-m1A ( $\mu$ M)    | V0 ( $\mu$ M/min) | ss-m3C ( $\mu$ M) | V0 ( $\mu$ M/min) |
| 7.5                  | 0.30 $\pm$ 0.02   | 5.0               | 0.22 $\pm$ 0.01   |
| 10.0                 | 0.33 $\pm$ 0.02   | 7.5               | 0.24 $\pm$ 0.01   |
| 12.5                 | 0.35 $\pm$ 0.03   | 10.0              | 0.25 $\pm$ 0.01   |
| 15.0                 | 0.36 $\pm$ 0.02   | 12.5              | 0.27 $\pm$ 0.01   |
| 17.5                 | 0.37 $\pm$ 0.02   | 15.0              | 0.26 $\pm$ 0.01   |
| 20.0                 | 0.38 $\pm$ 0.03   | 17.5              | 0.28 $\pm$ 0.01   |

**Table S4.** Kinetic constants of ALKBH2 and ALKBH3 reactions on DNA adducts as substrates.

| Enzyme | Substrate | $K_M$ [ $\mu$ M] | $k_{cat}$ [ $\text{min}^{-1}$ ] | $k_{cat}/K_M$ [ $\text{min}^{-1}\cdot\mu\text{M}^{-1}$ ] |
|--------|-----------|------------------|---------------------------------|----------------------------------------------------------|
| ALKBH2 | ss-m1A    | 35.9 $\pm$ 18.2  | 8.9 $\pm$ 3.2                   | 0.25                                                     |
|        | ds-m1A    | 12.6 $\pm$ 1.4   | 9.3 $\pm$ 0.5                   | 0.74                                                     |
|        | ss-m3C    | 4.4 $\pm$ 1.1    | 2.4 $\pm$ 0.3                   | 0.53                                                     |
|        | ds-m3C    | 5.0 $\pm$ 1.5    | 5.5 $\pm$ 0.6                   | 1.10                                                     |
| ALKBH3 | ss-m1A    | 3.5 $\pm$ 0.2    | 1.8 $\pm$ 0.0                   | 0.52                                                     |
|        | ss-m3C    | 1.9 $\pm$ 0.5    | 1.2 $\pm$ 0.1                   | 1.03                                                     |

**Table S5.** 2-HG inhibition on ALKBH2 demethylation of ss- and ds-m1A.**D-2HG** inhibition on ALKBH2 demethylation of **ss-m1A**.

| Product<br>Time/min<br>D-2HG<br>/μM /mM | 0.0         | 1.0         | 3.0         | 5.0         | 9.0         |
|-----------------------------------------|-------------|-------------|-------------|-------------|-------------|
| 3                                       | 1.23 ± 0.07 | 1.07 ± 0.06 | 0.80 ± 0.03 | 0.61 ± 0.05 | 0.47 ± 0.04 |
| 6                                       | 1.43 ± 0.07 | 1.22 ± 0.07 | 0.93 ± 0.05 | 0.69 ± 0.05 | 0.55 ± 0.02 |
| 9                                       | 1.50 ± 0.06 | 1.29 ± 0.07 | 0.99 ± 0.04 | 0.70 ± 0.02 | 0.57 ± 0.04 |
| 12                                      | 1.67 ± 0.06 | 1.44 ± 0.05 | 1.11 ± 0.04 | 0.82 ± 0.04 | 0.63 ± 0.03 |
| 15                                      | 1.78 ± 0.08 | 1.51 ± 0.08 | 1.18 ± 0.03 | 0.89 ± 0.04 | 0.70 ± 0.03 |

**D-2HG** inhibition on ALKBH2 demethylation of **ds-m1A**

| Product<br>Time/min<br>D-2HG<br>/μM /mM | 0.0         | 1.0         | 3.0         | 5.0         | 9.0         |
|-----------------------------------------|-------------|-------------|-------------|-------------|-------------|
| 5                                       | 1.54 ± 0.04 | 1.20 ± 0.08 | 0.85 ± 0.02 | 0.59 ± 0.07 | 0.37 ± 0.15 |
| 8                                       | 1.68 ± 0.11 | 1.43 ± 0.03 | 0.96 ± 0.02 | 0.74 ± 0.12 | 0.44 ± 0.10 |
| 11                                      | 1.67 ± 0.01 | 1.55 ± 0.19 | 1.06 ± 0.22 | 0.81 ± 0.13 | 0.52 ± 0.02 |
| 14                                      | 1.85 ± 0.01 | 1.59 ± 0.13 | 1.08 ± 0.11 | 0.82 ± 0.11 | 0.52 ± 0.06 |

**D-2HG** inhibition on ALKBH2 demethylation of **ss-m1A** and **ds-m1A** under 373 fold to αKG condition.

| Repair<br>ratio %<br>Substrate<br>D-2HG<br>/mM | 0.0        | 9.0        | 37.3       |
|------------------------------------------------|------------|------------|------------|
| ss-m1A                                         | 93.9 ± 6.4 | 37.2 ± 1.5 | 12.7 ± 0.1 |
| ds-m1A                                         | 97.7 ± 1.6 | 37.8 ± 2.8 | 22.3 ± 0.8 |

**L-2HG inhibition on ALKBH2 demethylation of ss-m1A**

| Product / $\mu$ M<br>L-2HG /mM<br>Time/min | 0.0             | 1.0             | 3.0             | 5.0             | 9.0             |
|--------------------------------------------|-----------------|-----------------|-----------------|-----------------|-----------------|
| 3                                          | 1.34 $\pm$ 0.05 | 0.82 $\pm$ 0.03 | 0.54 $\pm$ 0.02 | 0.43 $\pm$ 0.03 | 0.34 $\pm$ 0.03 |
| 6                                          | 1.61 $\pm$ 0.05 | 1.04 $\pm$ 0.03 | 0.67 $\pm$ 0.01 | 0.53 $\pm$ 0.05 | 0.44 $\pm$ 0.00 |
| 9                                          | 1.62 $\pm$ 0.04 | 1.13 $\pm$ 0.08 | 0.72 $\pm$ 0.02 | 0.59 $\pm$ 0.02 | 0.46 $\pm$ 0.01 |
| 12                                         | 1.84 $\pm$ 0.09 | 1.28 $\pm$ 0.07 | 0.85 $\pm$ 0.02 | 0.68 $\pm$ 0.01 | 0.53 $\pm$ 0.01 |
| 15                                         | 1.96 $\pm$ 0.09 | 1.33 $\pm$ 0.07 | 0.92 $\pm$ 0.04 | 0.73 $\pm$ 0.02 | 0.54 $\pm$ 0.03 |

**L-2HG inhibition on ALKBH2 demethylation of ds-m1A**

| Product / $\mu$ M<br>L-2HG /mM<br>Time/min | 0.0             | 1.0             | 3.0             | 5.0             | 9.0             |
|--------------------------------------------|-----------------|-----------------|-----------------|-----------------|-----------------|
| 5                                          | 2.21 $\pm$ 0.14 | 1.19 $\pm$ 0.09 | 0.67 $\pm$ 0.07 | 0.48 $\pm$ 0.05 | 0.38 $\pm$ 0.04 |
| 8                                          | 2.56 $\pm$ 0.13 | 1.74 $\pm$ 0.03 | 0.95 $\pm$ 0.03 | 0.61 $\pm$ 0.06 | 0.43 $\pm$ 0.02 |
| 11                                         | 2.84 $\pm$ 0.22 | 2.05 $\pm$ 0.12 | 1.12 $\pm$ 0.07 | 0.79 $\pm$ 0.08 | 0.51 $\pm$ 0.03 |
| 14                                         | 2.94 $\pm$ 0.03 | 2.18 $\pm$ 0.08 | 1.04 $\pm$ 0.31 | 0.85 $\pm$ 0.03 | 0.54 $\pm$ 0.03 |

**L-2HG inhibition on ALKBH2 demethylation of ss-m1A and ds-m1A under 28 fold to  $\alpha$ KG condition.**

| Repair ratio %<br>Substrate<br>L-2HG /mM | 0.0            | 1.0            | 2.8            |
|------------------------------------------|----------------|----------------|----------------|
| ss-m1A                                   | 80.8 $\pm$ 0.9 | 55.1 $\pm$ 2.9 | 38.3 $\pm$ 0.5 |
| ds-m1A                                   | 85.0 $\pm$ 1.2 | 65.1 $\pm$ 2.0 | 37.0 $\pm$ 0.5 |

**Table S6.** Addition of  $\alpha$ KG reverses the inhibitory effect of 2HG toward ALKBH2, ALKBH3 and AlkB. Both D-2HG and L-2HG concentrations were fixed at 10.0 mM.

| Repair ratio%<br>$\alpha$ KG | Group | ALKBH2       |       |       | ALKBH3       |       |       | AlkB         |       |       |
|------------------------------|-------|--------------|-------|-------|--------------|-------|-------|--------------|-------|-------|
|                              |       | No inhibitor | D-2HG | L-2HG | No inhibitor | D-2HG | L-2HG | No inhibitor | D-2HG | L-2HG |
| 0.1 mM                       |       | 61.5±        | 22.0± | 10.9± | 60.0±        | 37.0± | 20.9± | 66.0±        | 24.2± | 30.2± |
|                              |       | 1.5          | 0.7   | 0.5   | 1.3          | 0.6   | 1.1   | 0.2          | 0.4   | 1.5   |
| 0.5 mM                       |       | 66.0±        | 35.1± | 21.5± | 59.4±        | 43.3± | 34.2± | 65.8±        | 29.2± | 36.9± |
|                              |       | 0.6          | 0.8   | 0.6   | 0.1          | 0.9   | 1.9   | 0.3          | 1.1   | 1.7   |
| 1.0 mM                       |       | 63.9±        | 38.1± | 25.5± | 57.9±        | 46.6± | 39.2± | 65.0±        | 29.0± | 40.2± |
|                              |       | 0.5          | 1.1   | 0.4   | 1.6          | 2.2   | 0.6   | 0.3          | 0.7   | 2.6   |

**Table S7:** IC<sub>50</sub> (50% inhibition concentration) of L-2HG, D-2HG and N-OG on ALKBH2, ALKBH3 and AlkB.

| Enzyme | Adduct | IC <sub>50</sub> [mM] |            |                 |
|--------|--------|-----------------------|------------|-----------------|
|        |        | D-2HG                 | L-2HG      | N-OG            |
| ALKBH2 | ss-m1A | 10.3 ± 1.6            | 7.0 ± 1.1  | 0.8 ± 0.2       |
|        | ds-m1A | 4.7 ± 0.8             | 2.7 ± 0.5  | 0.2 ± 0.1       |
|        | ss-m3C | 10.9 ± 1.0            | 4.6 ± 0.2  | 2.9 ± 0.5       |
|        | ds-m3C | 4.2 ± 0.6             | 4.1 ± 0.6  | 0.4 ± 0.1       |
| ALKBH3 | ss-m1A | 24.3 ± 3.5            | 8.3 ± 1.0  | 1.2 ± 0.2       |
|        | ss-m3C | 26.4 ± 2.5            | 12.3 ± 0.8 | 2.0 ± 0.2       |
| AlkB   | ss-m1A | 8.6 ± 2.5             | 5.1 ± 1.5  | 6.7E-03±1.5E-03 |
|        | ds-m1A | 4.7 ± 1.1             | 5.3 ± 1.5  | 1.8E-02±1.1E-02 |
|        | ss-m3C | 2.7 ± 0.7             | 1.7 ± 0.7  | 2.3E-03±0.6E-03 |
|        | ds-m3C | 2.4 ± 0.6             | 3.2 ± 1.1  | 1.7E-03±0.3E-03 |

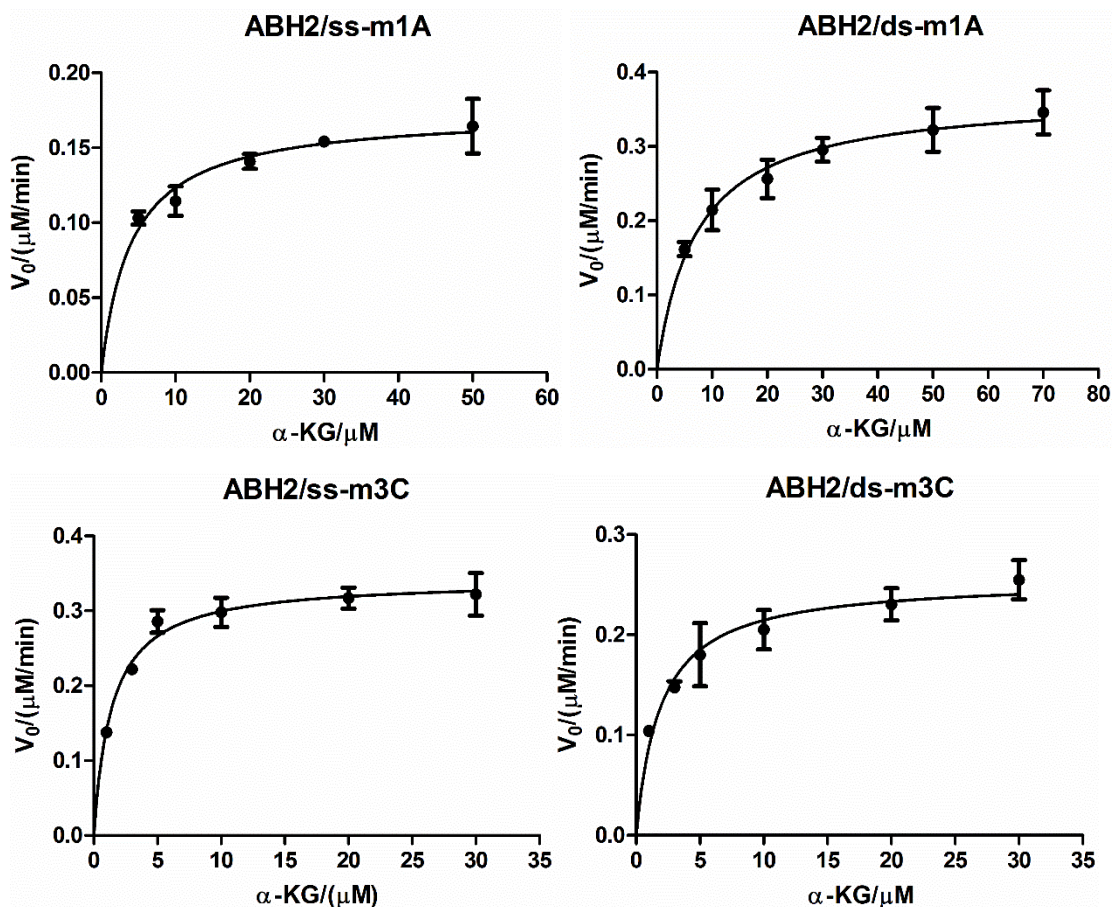

**Figure S1.** Steady-state kinetic studies probing the influence of  $\alpha\text{KG}$  on adduct demethylation reactions catalyzed by ALKBH2. Data are in Table S2.

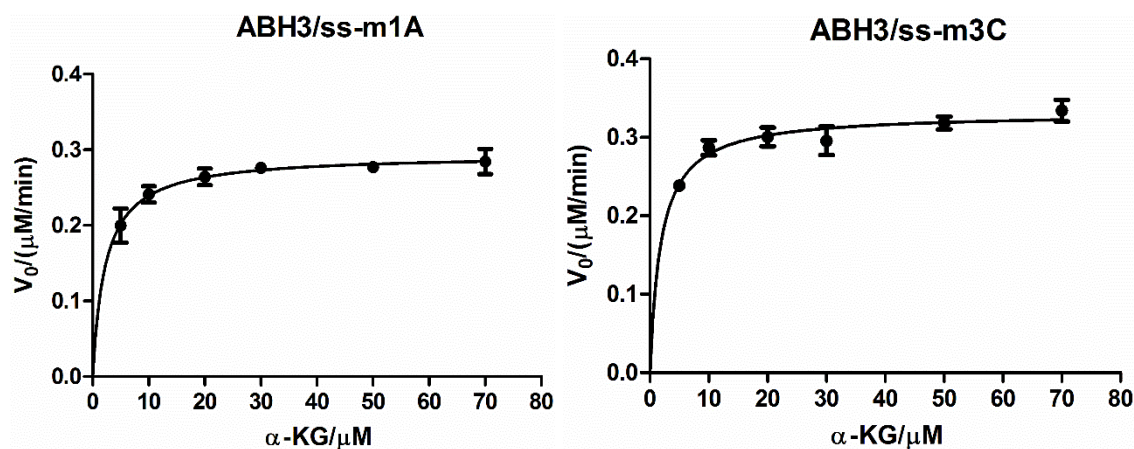

**Figure S2.** Steady-state kinetic studies probing the influence of  $\alpha\text{KG}$  on adduct demethylation reactions catalyzed by ALKBH3. Data are in Table S2.



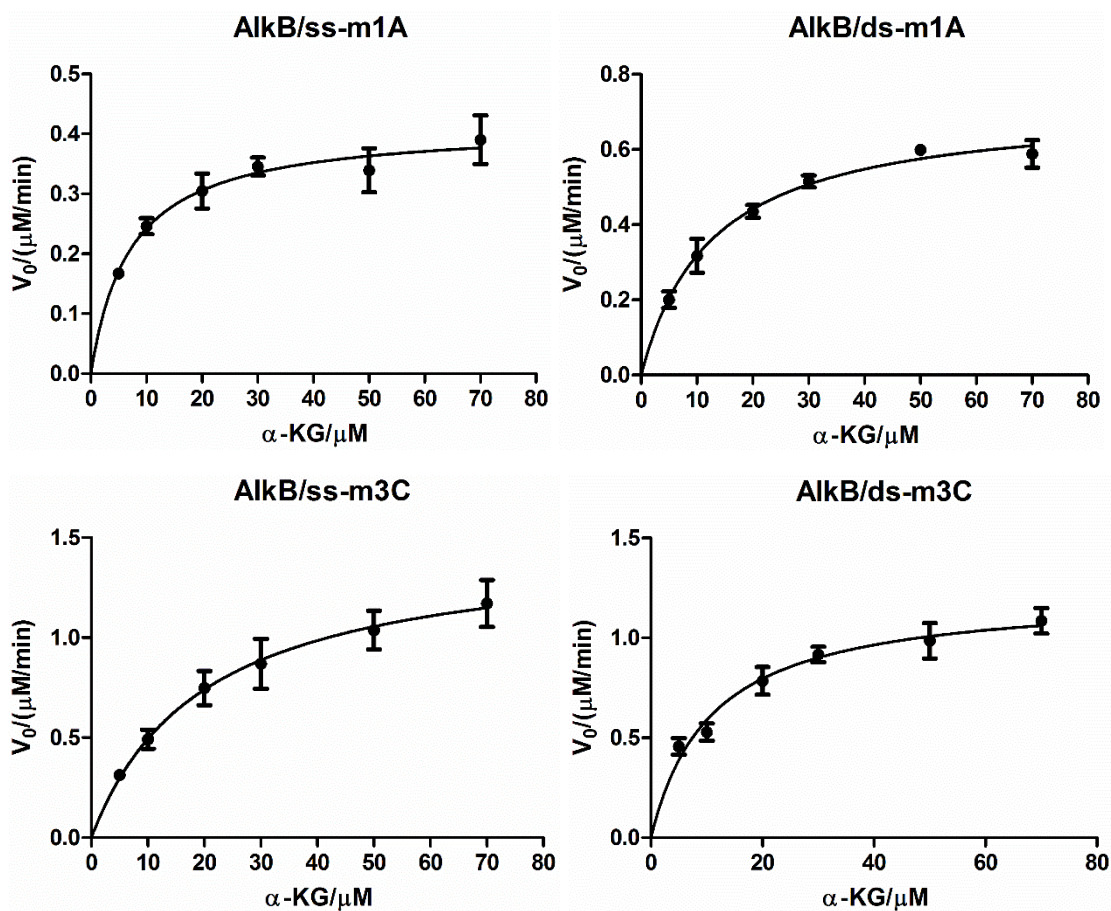

**Figure S3.** Steady-state kinetic studies probing the influence of  $\alpha$ KG on adduct demethylation reactions catalyzed by AlkB. Data are in Table S2.

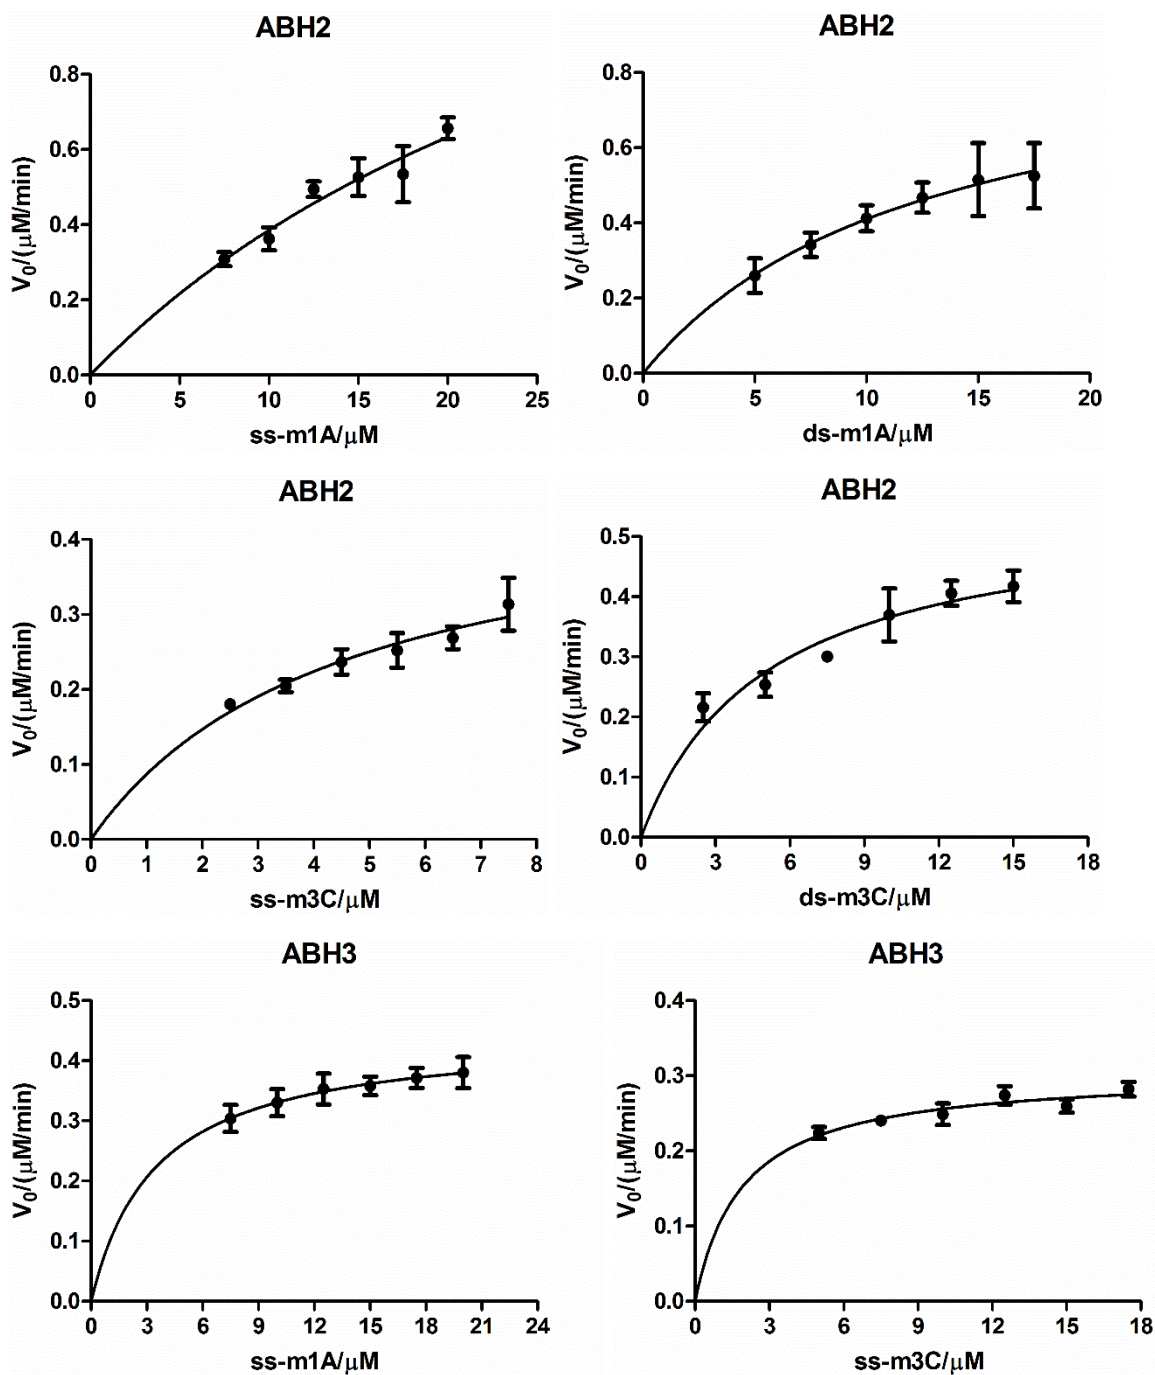

**Figure S4.** Steady-state kinetic studies probing the influence of adducts in the demethylation reactions catalyzed by ALKBH2 and ALKBH3. Data are in Table S3.

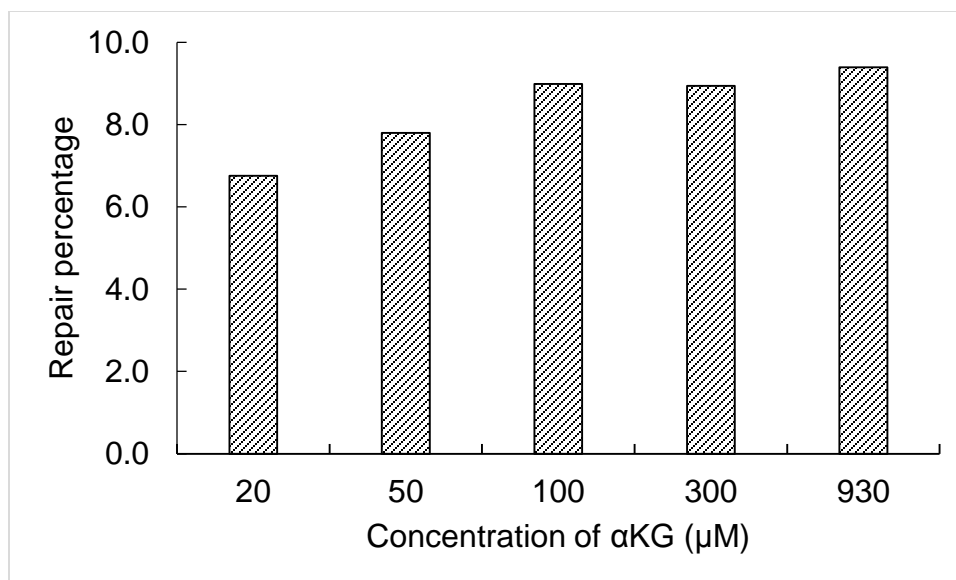

**Figure S5.** The repair percentage of AlkB on ss-m1A under various concentrations of  $\alpha$ KG. Y-axis represents the percentage conversion of starting material m1A to product A.

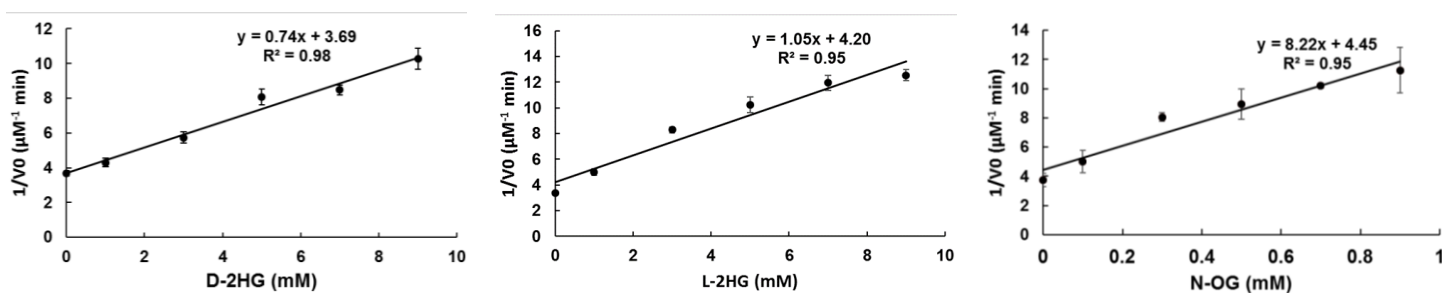

**Figure S6.** Inhibition of ALKBH2-mediated ss-m1A repair by D-2HG, L-2HG and N-OG. Left: D-2HG, middle: L-2HG and right: N-OG.

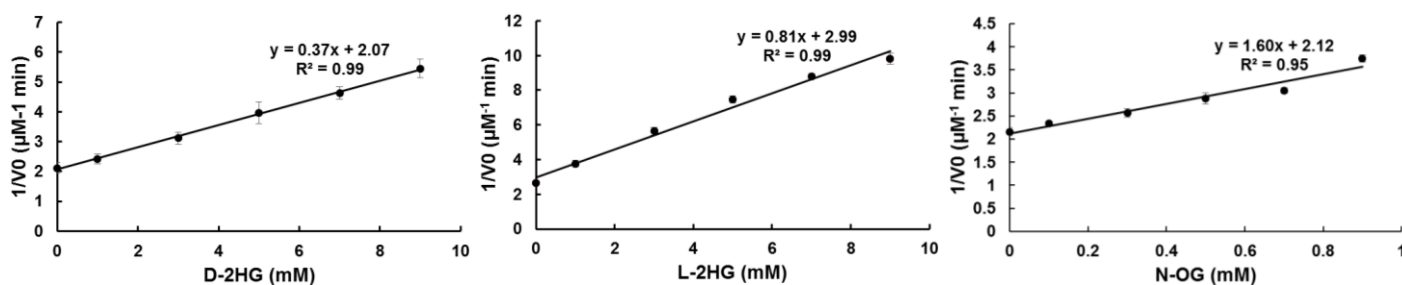

**Figure S7.** Inhibition of ALKBH2-mediated ss-m3C repair by D-2HG, L-2HG and N-OG. Left: D-2HG, middle: L-2HG and right: N-OG.

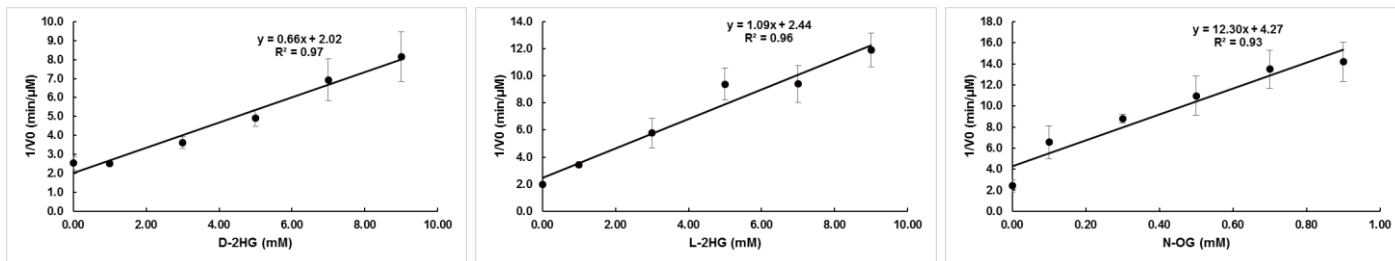

**Figure S8.** Inhibition of ALKBH2-mediated ds-m1A repair by D-2HG, L-2HG and N-OG. Left: D-2HG, middle: L-2HG and right: N-OG.

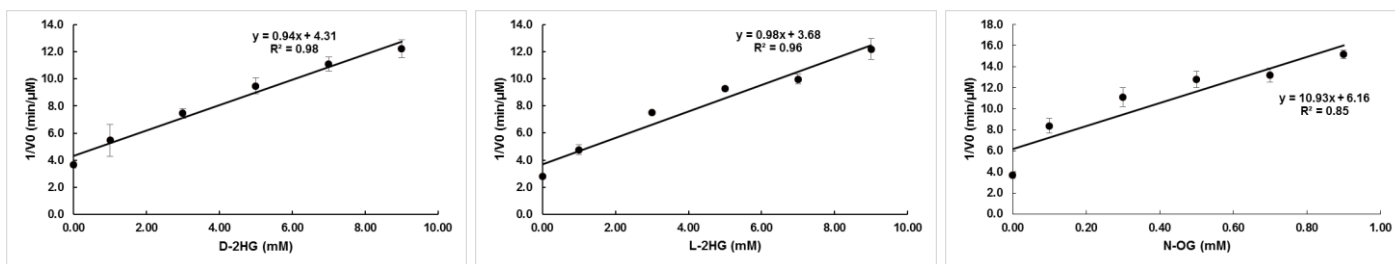

**Figure S9.** Inhibition of ALKBH2-mediated ds-m3C repair by D-2HG, L-2HG and N-OG. Left: D-2HG, middle: L-2HG and right: N-OG.

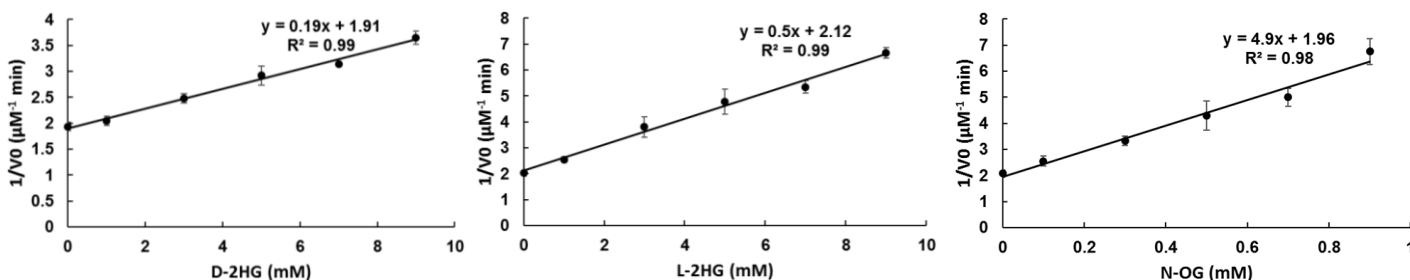

**Figure S10.** Inhibition of ALKBH3-mediated ss-m1A repair by D-2HG, L-2HG and N-OG. Left: D-2HG, middle: L-2HG and right: N-OG.

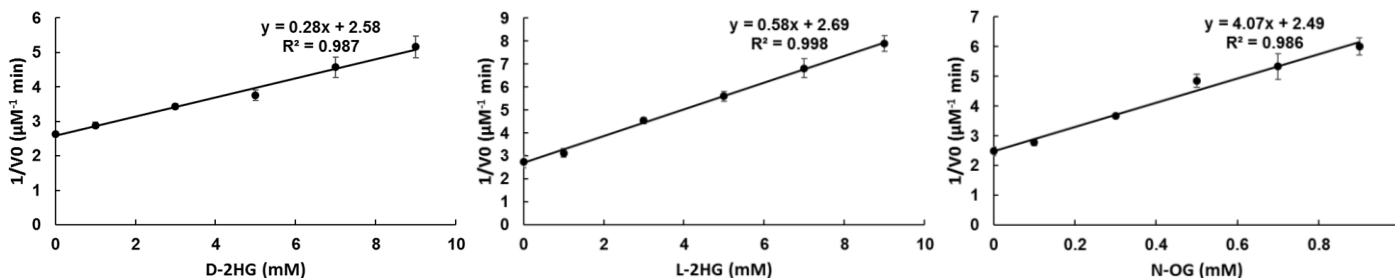

**Figure S11.** Inhibition of ALKBH3-mediated ss-m3C repair by D-2HG, L-2HG and N-OG. Left: D-2HG, middle: L-2HG and right: N-OG.

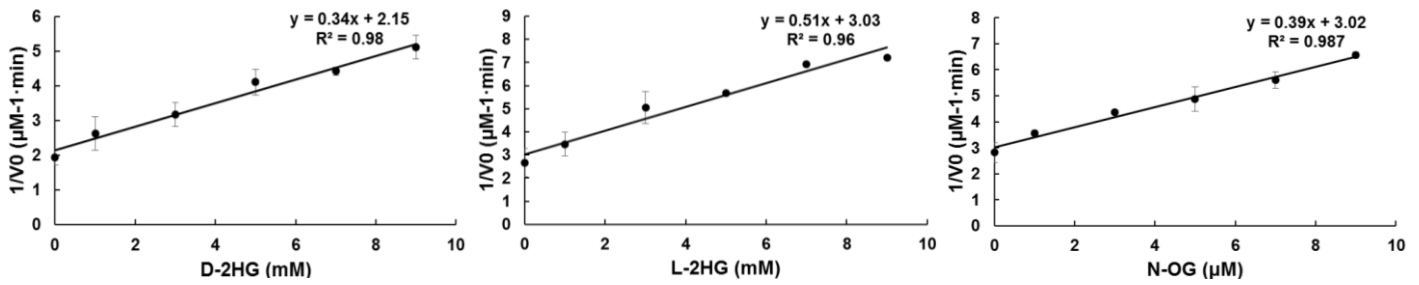

**Figure S12.** Inhibition of AlkB-mediated ss-m1A repair by D-2HG, L-2HG and N-OG. Left: D-2HG, middle: L-2HG and right: N-OG.

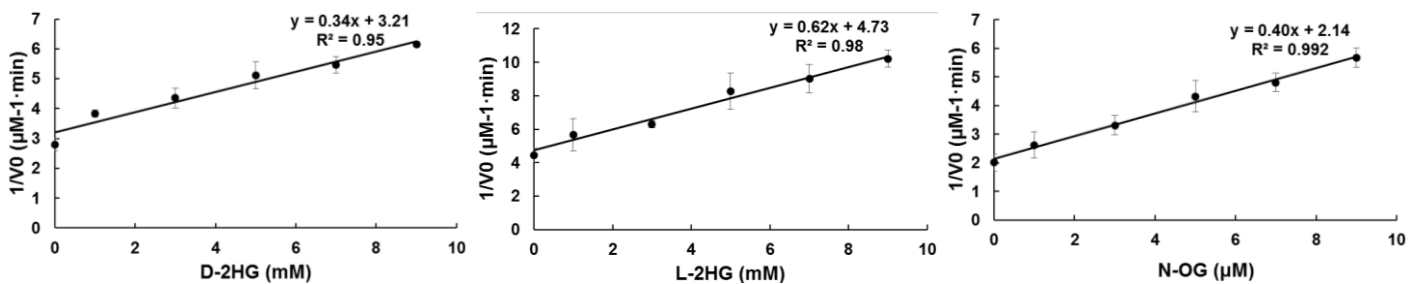

**Figure S13.** Inhibition of AlkB-mediated ss-m3C repair by D-2HG, L-2HG and N-OG. Left: D-2HG, middle: L-2HG and right: N-OG.

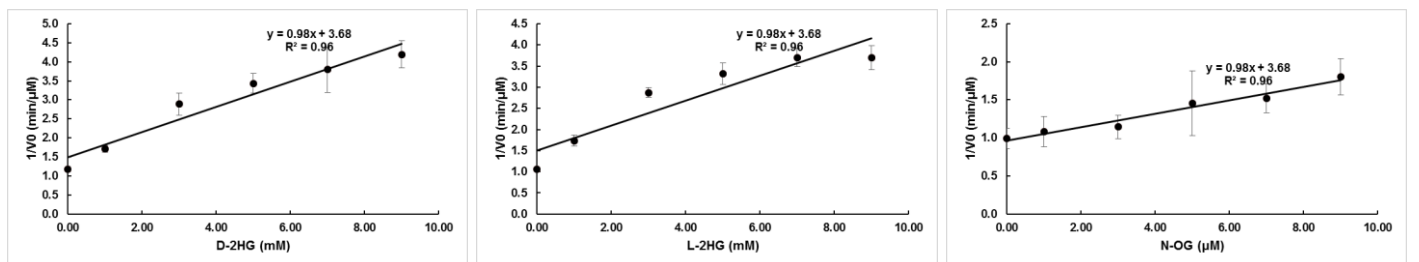

**Figure S14.** Inhibition of AlkB-mediated ds-m1A repair by D-2HG, L-2HG and N-OG. Left: D-2HG, middle: L-2HG and right: N-OG.

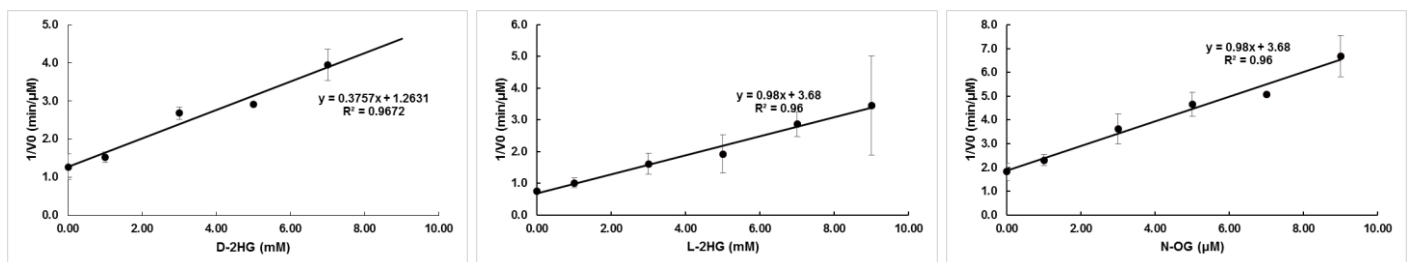

**Figure S15.** Inhibition of AlkB-mediated ds-m3C repair by D-2HG, L-2HG and N-OG. Left: D-2HG, middle: L-2HG and right: N-OG.
